Title: THE EFFECTS OF EPIDURAL MORPHINE ON POST OPERATIVE ANALGESIA.

Authors: P.D. Allen, MD, Ph.D, A. Terry Walman, MD, David J. Cullen, MD, Michael Shesky, MD, Kay Patterson, M.D., Benjamin Covino, Ph.D, MD.

Affiliation: Department of Anesthesia, Brigham and Women's Hospital, Harvard Medical School, 75 Francis Street, Boston, MA 02115

Department of Anesthesia, Massachusetts General Hospital, Fruit Street, Boston, MA 02114

### Introduction:

Epidural morphine has been used with increasing frequency for postoperative analgesia. Case records and limited small studies abound, with reports of serious side effects as well as claims of effectiveness for producing pain relief. Many authors and editorialists have called for the need to conduct definitive randomized double blind studies to accurately assess efficacy, dose, and safety. The results of a prospective double blind study evaluating the dose response relationship of four doses of morphine sulfate (MS) given epidurally to postoperative vascular surgical patients are reported. Most authors have determined that the onset of epidural MS analgesia is from thirty minutes to one hour. In an attempt to provide a "painfree" postoperative experience, onset was not evaluated and the dose was given before the regression of the local anesthetic block.

### Materials and Methods:

34 patients aged 54-80 undergoing femoral popliteal bypass surgery were studied after obtaining informed consent as approved by our Human Research Committee. No patients who were chronic users of narcotic analgesics were included. All patients were premedicated with Diazepam 10mg P.O. and were successfully anesthetized for surgery using Lumbar catheter epidural anesthesia (1.5% Etidocaine with epi. or 0.75% bupivacaine). After arrival in the recovery room and before the local anesthetic blockade had regressed all patients received an epidural injection of 0,2,5, or 10 mg. of preservative free MS in 10 ml. of normal saline. The catheter was then removed. Patients were observed for 24 hours after epidural injection. BP, P, R, Visual Analog Pain Scale (VAS), nausea, vomiting, itching, and additional analgesic drug requirements were recorded at 0, 1/2, 1, 2, 4, 8, 11, 12, 16, 20 and 24 hours post injection. A single arterial blood gas was taken 11 hours post injection (a time which was shown to be at the nadir of CO<sub>2</sub> response after a single epidural morphine injection (1)). Differences between dose levels were compared using non-parametric analysis. (Kruskal-Wallis and Wilcoxon).

### Results:

All 4 dose groups were matched demographically. We did not find a specific time period which demonstrated a significant break in the VAS between the 4 groups. The cumulative 24 hour VAS showed a significant relationship for dose despite adequate additional parenteral medication when requested ( $p < 0.05$ ) indicating better overall

analgesia with epidural MS. The number of patients who required additional postoperative analgesia during the 24 hour study period is seen below:

| Dose/N        | 0mg/8 | 2mg/8 | 5mg/9 | 10mg/9 |
|---------------|-------|-------|-------|--------|
| No Medication | 25%   | 37%   | 44%   | 77%    |
| Medication    | 75%   | 63%   | 56%   | 23%    |

Anova Significant for dose  $p < 0.05$

We saw no clinical evidence of respiratory depression in any patient at any dose. The 11 hour PaCO<sub>2</sub> showed a significant relationship for dose ( $p < 0.05$ )

| Dose              | 0mg  | 2mg  | 5mg  | 10mg                 |
|-------------------|------|------|------|----------------------|
| PaCO <sub>2</sub> | 39±1 | 39±1 | 39±1 | 45±1.6 (mean ± S.E.) |

There appeared to be a break point in the PaCO<sub>2</sub> between 5 and 10 mg. of MS which was statistically significant. ( $p < 0.01$ ) The highest measured PaCO<sub>2</sub> was 58mmHg and no patient required naloxone to reverse the respiratory depression. Somnolence was not observed. Nausea occurred in 7 patients and itching in 4 patients with no relation to dose. One patient with nausea and one with itching was from the control group.

### Discussion:

This study demonstrated that epidural morphine can provide adequate, safe and long lasting postoperative analgesia. The technique of administering morphine before regression of local anesthetic analgesia made it possible to provide pain free experience for the patient in the postoperative period. There were significant advantages in our study to the 10 mg. dose for postoperative analgesia. The significant increase in PaCO<sub>2</sub> with the 10mg group is indicative of impending danger of respiratory depression. This suggests that perhaps a dose intermediate between 5 and 10mg may maximize analgesia with minimal respiratory depression.

### References

1. Nielsen, C.H., et al., CO<sub>2</sub> Sensitivity after Epidural and I.V. Morphine. Anesthesiology 55:A372, 1981.
